# Supplementary figures and images for: Interesting transport and magnetic properties in a new family of molecular materials based on the organic donor BET-TTF and the perrhenate anionElectronic supplementary information (ESI) available: overlap modes of the radical cations of 1–3. See http://www.rsc.org/suppdata/jm/b1/b106070h/
Source: Royal Society of Chemistry journal article supplement (doi:10.1039/b106070h), 2002-01-30

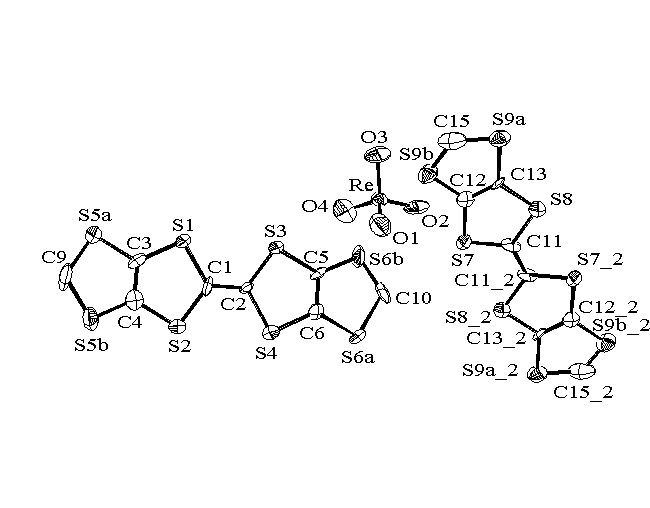

Supplement: b106070h2.doc [file b106070h2.doc]

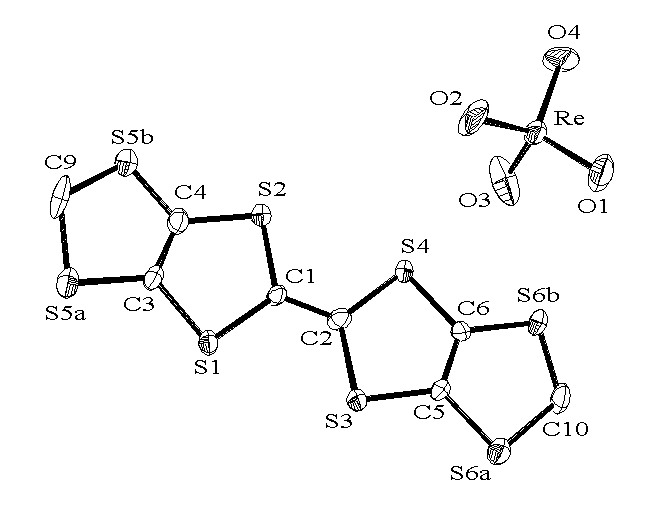

Supplement: b106070h1.doc [file b106070h1.doc]

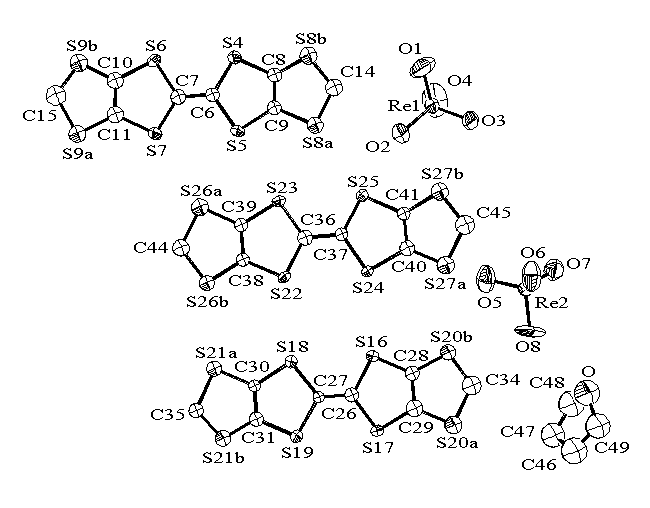

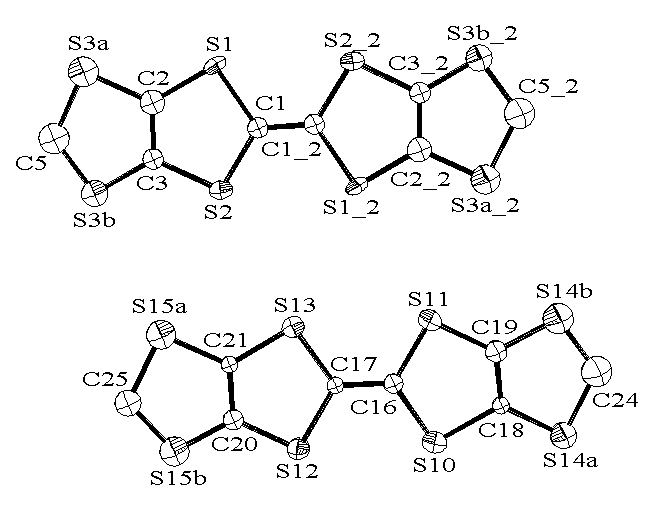

Supplement: b106070h3.doc [file b106070h3.doc]

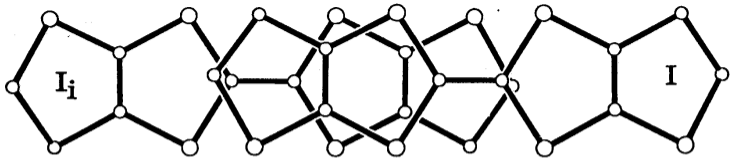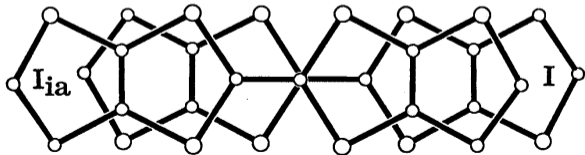

Supplement: b106070h4.pdf [file b106070h4.pdf]

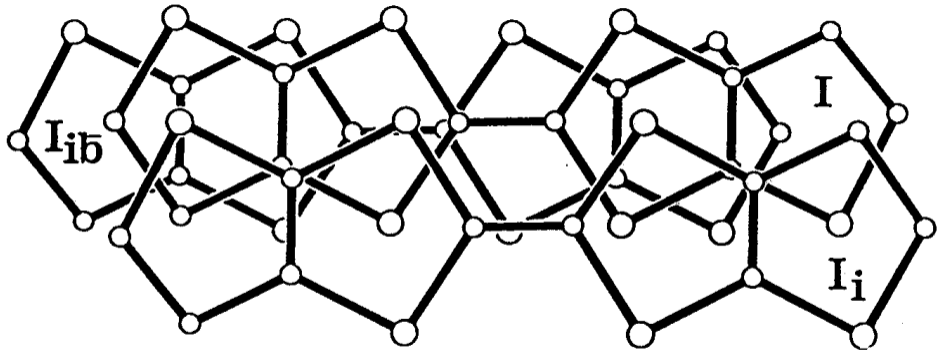

Supplement: b106070h5.pdf [file b106070h5.pdf]

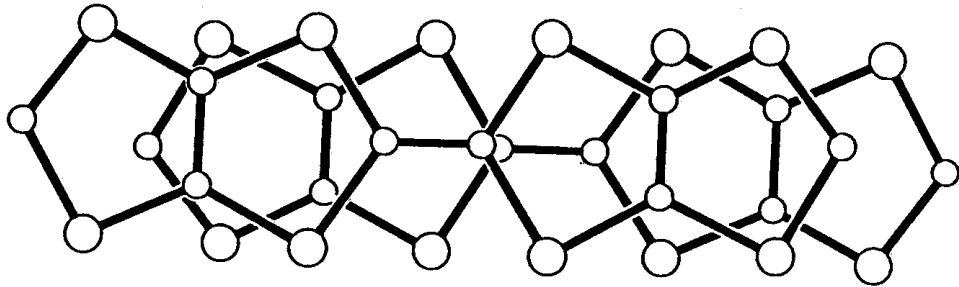

Supplement: b106070h6.pdf [file b106070h6.pdf]
